# Supplementary material for: Hydropower's Biogenic Carbon Footprint
Source: PubMed Central journal article supplement (PMC5023102; doi:10.1371/journal.pone.0161947), 2016-09-14
Supplement: pone.0161947.s001.pdf [file pone.0161947.s001.pdf]

## Hydropower's biogenic carbon footprint

Laura Scherer\* and Stephan Pfister

Institute of Environmental Engineering, ETH Zurich, 8093 Zurich, Switzerland

\*E-mail: scherer@ifu.baug.ethz.ch

### S1 Representation of climate zones in the model training dataset

The training dataset contains 154 hydropower plants [1] and covers all five climate zones [2] (**Figure S1**, **Table S1**). The dataset is biased towards Europe, North and South America. China, the biggest hydroelectricity producer worldwide [3], is not included in the dataset; however, most of the hydropower plants in China are situated in the temperate climate zone, which is well represented in the dataset (**Table S1**). In addition, the most important other hydroelectricity producing countries Brazil, Canada and the United States [3] are contained in the dataset (**Figure S1**).

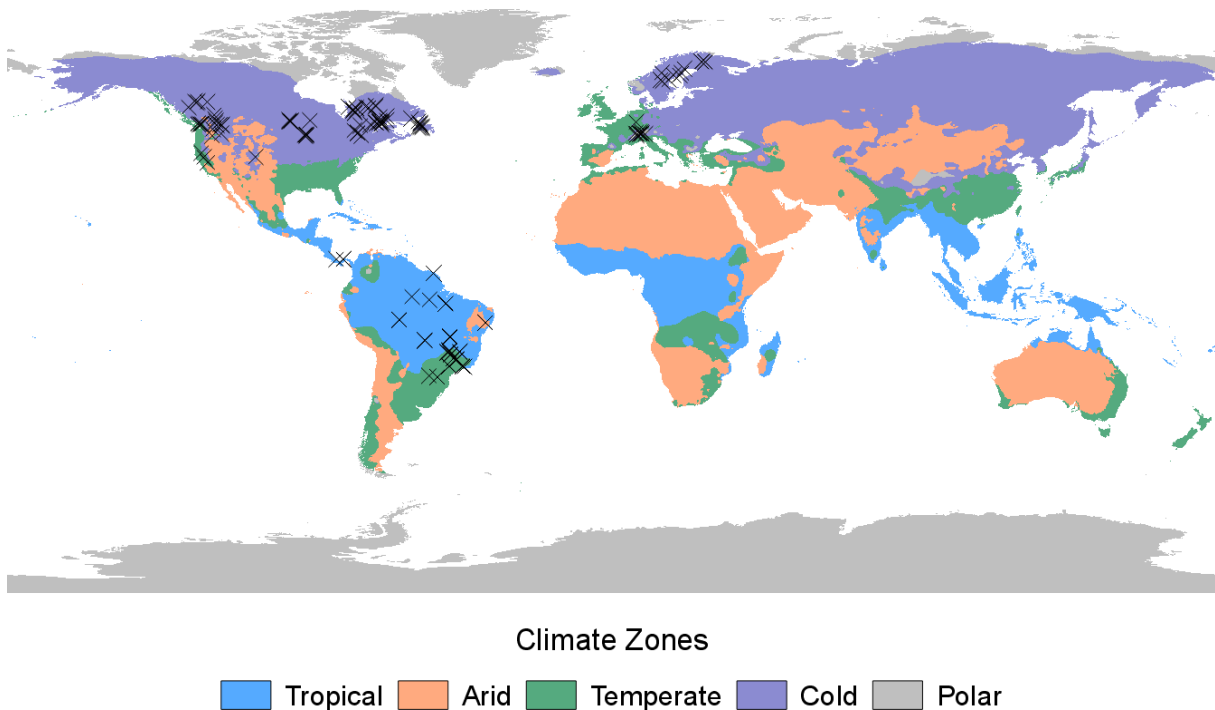

**Figure S1.** Distribution of hydropower plants used for setting up the model.

**Table S1.** Representation of climate zones.

| Climate zone | Tropical | Arid | Temperate | Cold | Polar |
|--------------|----------|------|-----------|------|-------|
| Number       | 31       | 2    | 31        | 79   | 9     |

## References

1. Barros N, Cole JJ, Tranvik LJ, Prairie YT, Bastviken D, Huszar VLM, et al. Carbon emission from hydroelectric reservoirs linked to reservoir age and latitude. *Nat Geosci.* 2011; 4: 593–596. doi: 10.1038/ngeo1211.
2. Peel MC, Finlayson BL, McMahon TA. Updated world map of the Köppen-Geiger climate classification. *Hydrol Earth Syst Sci.* 2007; 11: 1633–1644. doi: 10.5194/hess-11-1633-2007.
3. IEA. Key world energy statistics. Paris: International Energy Agency; 2014.
